1  
2  
3  
4  
5  
6  
7  
8  
9  
10  
11  
12  
13  
14  
15  
16  
17  
18  
19  
20  
21  
22  
23

Prevalence and Sociodemographic Covariates of Human Papillomavirus in the United States:  
Findings from the 2008 to 2020 National Inpatient Sample Database

Emily Dantes<sup>1</sup>, Mohammad Alfrad Nobel Bhuiyan<sup>1</sup>, Margaret Bourg<sup>1</sup>, Corey D. Smith<sup>2</sup>, Md.  
Shenuarin Bhuiyan<sup>2</sup>, Deborah G Smith<sup>3</sup>

<sup>1</sup>Department of Medicine, Louisiana State University Health Sciences Shreveport, Shreveport,  
LA, USA

<sup>2</sup>Department of Pathology and Translational Pathobiology, Louisiana State University Health  
Sciences Shreveport, Shreveport, LA, USA

<sup>3</sup>School of Allied Health Professions, Louisiana State University Health Sciences Shreveport,  
Shreveport, LA, USA

Corresponding Author:  
[eam001@lsuhs.edu](mailto:eam001@lsuhs.edu) (ED)

## 24 **Abstract**

25 Human papillomavirus (HPV) infection is widespread worldwide, leading to a significant burden  
26 of HPV-related cancers. This study aimed to identify the prevalence of HPV infection in the United  
27 States based on a large nationwide inpatient sample database. We used the Nationwide Inpatient  
28 Sample (NIS) database from 2008 to 2020 and identified HPV cases using the International  
29 Classification of Diseases, Ninth (ICD-9) and Tenth Revision (ICD-10) codes. Pearson's chi-  
30 square and independent-sample t-test were used for the analysis. The prevalence ratio was  
31 calculated using logistic regression models and the Cochran Armitage trend test to examine trends.  
32 A total of 47,506 HPV infections were identified from 2008 to 2020 among adults aged >18 years.  
33 Most patients were female (99.72%), with a higher prevalence among the 26-40 age group and  
34 white individuals. HPV infections were more prominent among low-income individuals and in the  
35 southern region of the United States. From 2008 to 2020, HPV increased from 6.76% to 10.91%.  
36 This study provides insights into the epidemiology of HPV infection in the United States.  
37 Understanding the trends and characteristics of HPV infection can contribute to public health  
38 interventions aimed at prevention and early detection.

39

## 40 **Introduction**

41 Human papillomavirus (HPV) infection is widespread worldwide, leading to a significant burden  
42 of HPV-related cancers (1, 2). In the United States, HPV is the most common sexually  
43 transmitted infection, and it is estimated that 14 million Americans were newly infected with  
44 HPV in 2018 (3, 4, 5). Nearly all sexually active adults are infected at some point during their  
45 lives, although they may be unaware of their infection (5). While most HPV infections are  
46 asymptomatic and resolve spontaneously, long-lasting infections can progress into genital warts,

47 as well as oropharyngeal and anogenital cancers (including anal, penile, vaginal, vulvar, and  
48 cervical) (2, 5).

49 More than 200 distinct types of HPV have been identified, with types falling into a low-risk or  
50 high-risk group (4). Low-risk types rarely lead to symptoms or clinical disease. High-risk or  
51 oncogenic HPV types, similarly asymptomatic at the onset of infection, may develop into cancer  
52 years later if undetected and untreated. According to the National Cancer Institute, high-risk  
53 HPV types cause 3% of all cancers in women and 2% in men in the United States (6). From 2015  
54 to 2019, about 47,199 new HPV-associated cancers occurred annually in the United States (5, 7).

55 Among women, cervical cancer is the most common HPV-associated cancer (5). It is currently  
56 the fourth most common cancer in women worldwide (2). Among men, oropharyngeal cancers  
57 (cancers of the back of the throat, including the base of the tongue and tonsils) are the most  
58 common (5, 8, 9). The incidence of oropharyngeal cancer in the United States increased by  
59 approximately 1.94% per year from 2000-2015 and has been projected to increase continuously  
60 over the next thirty years (10).

61 Many risk factors for HPV infection have been identified, including having multiple sexual  
62 partners, sexual intercourse at a younger age (<15), long-term use of oral contraceptives,  
63 smoking, low socioeconomic status, age, and genetic factors (5). Risk factors related to lifestyle  
64 behaviors can be addressed with public health intervention, which is necessary to prevent new  
65 infections and cancer progression (11). One important intervention is HPV vaccination, which  
66 has been demonstrated to prevent up to 90% of HPV-related cancers (6). The American Cancer  
67 Society recommends routine HPV vaccination for all persons aged 9 to 12 years old, with catch-  
68 up vaccination for those under 26 who are not adequately vaccinated (12). However,  
69 immunization rates in the US are much lower than for other vaccines, with only 59% of

70 adolescents aged 13 to 17 years old being up to date with HPV vaccination as of 2020 (12). In  
71 addition, vaccination does not protect against all types of HPV, nor does it protect against  
72 already-established HPV infection (12). Another important intervention is early detection  
73 through screening; however, not all types of HPV-associated diseases and cancer have screening  
74 recommendations. For instance, while pap tests and HPV co-tests are available to screen for  
75 HPV-related cervical cancer, there is no method recommended by the American Cancer Society  
76 or the U.S. Preventative Services Task Force to screen for other HPV-related cancers like  
77 oropharyngeal, anal, penile, vulvar, or vaginal cancer (13). Due to these limitations, it is  
78 important to understand the current epidemiology of HPV infection in the United States. This  
79 study aims to understand the trends and identify the prevalence of HPV infection in the United  
80 States from 2008 to 2020 based on NIS data.

81

## 82 **Material & Methods**

83 We used the Healthcare Cost and Utilization Project (HCUP)'s Nationwide Inpatient Sample  
84 (NIS) database from 2008 to 2020 (accessed December 19, 2022) and identified HPV -related  
85 hospital discharge cases using the International Classification of Diseases, ninth (ICD-9) and  
86 tenth Revision (ICD-10) codes to conduct a retrospective study. NIS's database is the largest  
87 inpatient database, which covers information from seven million hospital stays yearly from 45  
88 states in the United States. This database contains data from 20% of hospital discharges from all  
89 hospitals in HCUP (14).

90 To improve the sample's representativeness, accuracy, and stability of weighted national  
91 estimates, the NIS was changed in 2012 to include 20% of all hospital discharges in HCUP.

92 Before 2012, the NIS included all discharges from 20% of hospitals in the HCUP (15). The NIS

93 data are organized so that each observation in the sample relates to a unique hospitalization. The  
94 NIS database provides information on more than 100 clinical characteristics, including patient  
95 demographics (such as age, sex, race, and the median income for ZIP code), hospital  
96 characteristics (such as ownership, size, teaching status, census region, and division), primary  
97 and up to 24 secondary diagnoses, 15 procedures as administrative codes, and codes for disease  
98 severity. Additionally, because it contains data on several million hospitalizations each year, it  
99 enables the analysis of healthcare utilization for issues related to rare diseases treated primarily  
100 in an inpatient setting.

101 Because the NIS database is deidentified, the Institutional Review Board (IRB) waived the IRB  
102 application. Authors did not have access to information that could identify individual participants  
103 during or after data collection. We included adult patients (age: >18 years and older) of male and  
104 female sex with a primary or secondary diagnosis of HPV based on the International  
105 Classification of Diseases, Ninth (ICD-9) and Tenth revision (ICD-10) diagnosis code (ICD-9 =  
106 795.05, 795.09, 796.75, 796.79, ICD-10 = R87.810, R87.820, R85.81, R85.82) (Appendix A).

107 When analyzing NIS hospital discharge data, we adhered to AHRQ's suggestions for producing  
108 national estimates from NIS data. Data was weighted with care to account for the change in  
109 database structure that occurred in 2012. The hospital discharge trend weight (TRENDWT) was  
110 used to weight data for 2012 and earlier, while regular discharge weight (DISCWT) was used to  
111 weight data for years after 2012. Descriptive statistics were used to characterize participant  
112 details. Continuous variables were summed for weighted and unweighted data, while mean and  
113 categorical variables were presented as frequencies, percentages, and 95% Confidence Intervals  
114 (CI). Design-based t-tests were used for continuous values, and design-based Chi-squared tests  
115 were applied for categorical values. The prevalence ratio was calculated using binomial logistic

116 regression models. Linear regression models and the Cochran Armitage trend test were utilized  
 117 to examine trends and contrast two groups. A p-value <0.05 was utilized to determine the  
 118 statistical significance of the variables. All statistical tests were conducted using the free and  
 119 open-source software R. (version 4.2.1).

120

## 121 Results

122 We analyzed 395 million weighted hospital-discharged patients aged >18 or older from 2008-  
 123 2020 NIS data. Overall, we found 47,506 hospital encounters with a primary or secondary  
 124 diagnosis of HPV. Regarding the characteristics of the patients, most were females, 99.72%,  
 125 61.2% were between 26-40 years old, and 41.59% were Whites. HPV-related hospital discharges  
 126 were more prominent among low-income individuals (35.33%) than high-income individuals  
 127 (17.78%). The prevalence was higher in the southern United States (44.72%). In addition, among  
 128 those patients with HPV, 19.3% had anemia, 15.4% were obese, and 10.2% were tobacco users  
 129 (Table 1).

130 **Table 1.** Demographic characteristics of patients with high-risk and low-risk HPV in the United  
 131 States, 2008 - 2020.

| Variables     | HPV diagnosis (n=47,506) |                         | High risk HPV (n=31,492) |                         | Low risk HPV (n=16,014) |                         |
|---------------|--------------------------|-------------------------|--------------------------|-------------------------|-------------------------|-------------------------|
|               | n (%)                    | 95% confidence interval | n (%)                    | 95% confidence interval | n (%)                   | 95% confidence interval |
|               | Weighted frequency (%)   |                         |                          |                         |                         |                         |
| NIS data year |                          |                         |                          |                         |                         |                         |
| 2008          | 3,212 (6.76%)            | 6.54 - 6.99             | 1,947 (6.18%)            | 5.92 - 6.45             | 1,274 (7.92%)           | 7.51 - 8.33             |
| 2009          | 2,123 (4.47%)            | 4.28 - 4.65             | 1,366 (4.34%)            | 4.11 - 4.56             | 762 (4.74%)             | 4.41 - 5.07             |
| 2010          | 2,605 (5.48%)            | 5.28 - 5.69             | 1,542 (4.90%)            | 4.66 - 5.13             | 1,068 (6.64%)           | 6.26 - 7.02             |
| 2011          | 3,201 (6.74%)            | 6.51 - 6.96             | 1,067 (3.39%)            | 3.19 - 3.59             | 2,144 (13.34%)          | 12.81 - 14.87           |
| 2012          | 2,770 (5.83%)            | 5.62 - 6.04             | 1,505 (4.78%)            | 4.54 - 5.01             | 1,265 (7.87%)           | 7.45 - 8.29             |

|                           |                 |               |                 |               |                 |      |
|---------------------------|-----------------|---------------|-----------------|---------------|-----------------|------|
| 2013                      | 2,970 (6.25%)   | 6.03 - 6.47   | 1,575 (5.0%)    | 4.76 - 5.24   | 1,395 (8.68%)   | 8.24 |
| 2014                      | 3,495 (7.36%)   | 7.12-7.59     | 2,065 (6.56%)   | 6.28 - 6.83   | 1,435 (8.93%)   | 8.48 |
| 2015                      | 3,740 (7.87%)   | 7.63 - 8.11   | 2,440 (7.75%)   | 7.45 - 8.04   | 1,310 (8.15%)   | 7.73 |
| 2016                      | 3,785 (7.97%)   | 7.72 - 8.21   | 2,740 (8.70%)   | 8.39 - 9.01   | 1,045 (6.50%)   | 6.12 |
| 2017                      | 4,610 (9.70%)   | 9.44 - 9.97   | 3,500 (11.11%)  | 10.77 - 11.46 | 1,115 (6.94%)   | 6.54 |
| 2018                      | 5,035 (10.60%)  | 10.32 - 10.88 | 4,135 (13.13%)  | 12.76 - 13.50 | 9,10 (5.66%)    | 5.3  |
| 2019                      | 4,775 (10.05%)  | 9.78 - 10.32  | 3,570 (11.34%)  | 10.99 - 11.69 | 1,205 (7.49%)   | 7.09 |
| 2020                      | 5,185 (10.91%)  | 10.63 - 11.19 | 4,040 (12.83%)  | 12.46 - 13.20 | 1,150 (7.15%)   | 6.75 |
| Sex                       |                 |               |                 |               |                 |      |
| Male                      | 114 (0.24%)     | 0.20 - 0.28   | 89 (0.28%)      | 0.22 - 0.34   | 25 (0.16%)      | 0.09 |
| Female                    | 47,387 (99.76%) | 99.72 - 99.80 | 31,402 (99.72%) | 99.66 - 99.78 | 16,048 (99.84%) | 99.7 |
| Age at discharge, years   |                 |               |                 |               |                 |      |
| 18-25 years               | 13,037 (27.44%) | 27.04 - 27.84 | 8,515 (27.04%)  | 26.55 - 27.53 | 4,557 (28.35%)  | 27.6 |
| 26-40 years               | 29,074 (61.20%) | 60.76 - 61.64 | 19,492 (61.90%) | 61.36 - 62.43 | 9,605 (59.74%)  | 58.9 |
| 41-64 years               | 4,672 (9.83%)   | 9.57 - 10.10  | 3,056 (9.71%)   | 9.38 - 10.03  | 1,621 (10.08%)  | 9.61 |
| ≥65 years                 | 723 (1.52%)     | 1.41 - 1.63   | 428 (1.36%)     | 1.23 - 1.49   | 295 (1.83%)     | 1.63 |
| Race                      |                 |               |                 |               |                 |      |
| White                     | 18,994 (41.59%) | 41.14 - 42.04 | 12,318 (40.65%) | 40.10- 41.20  | 6,696 (43.39%)  | 42.6 |
| Black                     | 10,754 (23.54%) | 23.16 - 23.93 | 7,790 (25.71%)  | 25.22 - 26.20 | 2,977 (19.29%)  | 18.6 |
| Hispanic                  | 11,855 (25.96%) | 25.55 - 26.36 | 7,417 (24.48%)  | 23.99 - 24.96 | 4,467 (28.94%)  | 28.2 |
| Asian or Pacific Islander | 1,657 (3.63%)   | 3.46 - 3.80   | 1,166 (3.85%)   | 3.63 - 4.07   | 490 (3.18%)     | 2.90 |
| Native American           | 353 (0.77%)     | 0.69 - 0.85   | 258 (0.85%)     | 0.75-0.95     | 96 (0.62%)      | 0.50 |
| Other                     | 2,060 (4.51%)   | 4.32 - 4.70   | 1,353 (4.46%)   | 4.23 - 4.70   | 708 (4.59%)     | 4.26 |
| Primary Payer             |                 |               |                 |               |                 |      |
| Medicare                  | 1,554 (3.28%)   | 3.12 - 3.44   | 1,038 (3.31%)   | 3.11 - 3.50   | 516 (3.22%)     | 2.94 |
| Medicaid                  | 25,168 (53.11%) | 52.66 - 53.56 | 16,876 (53.76%) | 53.21 - 54.31 | 8,317 (51.80%)  | 51.0 |
| Private Insurance         | 17,688 (37.33%) | 36.89 - 37.76 | 11,499 (36.63%) | 36.1 - 37.16  | 6,213 (38.69%)  | 37.9 |
| Self-pay                  | 1,571 (3.32%)   | 3.15 - 3.48   | 1,061 (3.38%)   | 3.18 - 3.58   | 515 (3.21%)     | 2.94 |
| No charge                 | 216 (0.45%)     | 0.39 - 0.52   | 114 (0.36%)     | 0.30 - 0.43   | 102 (0.63%)     | 0.51 |
| Other                     | 1,190 (2.51%)   | 2.37 - 2.65   | 805 (2.56%)     | 2.39 - 2.74   | 395 (2.46%)     | 2.22 |
| Median household Income   |                 |               |                 |               |                 |      |

|                             |                 |               |                    |               |                    |      |
|-----------------------------|-----------------|---------------|--------------------|---------------|--------------------|------|
| <50,000                     | 16,571 (35.33%) | 34.9 - 35.77  | 11,281<br>(36.29%) | 35.75 - 36.82 | 5,324<br>(33.54%)  | 32.8 |
| 50,000-64,999               | 11,328 (24.15%) | 23.77 - 24.54 | 7,505<br>(24.14%)  | 23.67 - 24.62 | 3,827<br>(24.11%)  | 23.4 |
| 65,000-85,999               | 10,658 (22.73%) | 22.35 - 23.11 | 7,081<br>(22.78%)  | 22.31 - 23.24 | 3,587<br>(22.60%)  | 21.9 |
| >86,000                     | 8,340 (17.78%)  | 17.44 - 18.13 | 5,221<br>(16.79%)  | 16.38 - 17.21 | 3,134<br>(19.75%)  | 19.1 |
| US Region                   |                 |               |                    |               |                    |      |
| Northeast                   | 7,230 (15.22%)  | 14.9 - 15.54  | 4,294<br>(13.63%)  | 13.26 - 14.01 | 2,950<br>(18.35%)  | 17.7 |
| Midwest                     | 7,631 (16.06%)  | 15.73 - 16.39 | 5,416 (17.2%)      | 16.78 - 17.62 | 2,225<br>(13.84%)  | 13.3 |
| South                       | 21,246 (44.72%) | 44.28 - 45.17 | 14,486<br>(46.0%)  | 45.45 - 46.55 | 6,780<br>(42.17%)  | 41.4 |
| West                        | 11,399 (23.99%) | 23.61 - 24.38 | 7,296<br>(23.17%)  | 22.7 - 23.63  | 4,123<br>(25.65%)  | 24.9 |
| Length of Hospital stay     |                 |               |                    |               |                    |      |
| 0 - 3 days                  | 38,949 (81.99%) | 81.64 - 82.33 | 25,949<br>(82.40%) | 81.98 - 82.82 | 13,054<br>(81.19%) | 80.5 |
| 4 - 6 days                  | 6,657 (14.01%)  | 13.7 - 14.33  | 4,366<br>(13.87%)  | 13.48 - 14.25 | 2,301<br>(14.31%)  | 13.7 |
| 7 - 9 days                  | 878 (1.85%)     | 1.73 - 1.97   | 550 (1.75%)        | 1.6 - 1.89    | 328 (2.04%)        | 1.82 |
| 10 - 12 days                | 303 (0.64%)     | 0.57 - 0.71   | 180 (0.57%)        | 0.49 - 0.66   | 123 (0.76%)        | 0.63 |
| >13 or more                 | 718 (1.51%)     | 1.4 - 1.62    | 446 (1.42%)        | 1.29 - 1.55   | 272 (1.69%)        | 1.49 |
| Died during hospitalization | 45 (0.1%)       | 0.07 - 0.12   | 40 (0.13%)         | 0.09 - 0.17   | 5 (0.03%)          | 0.0  |
| Comorbidities               |                 |               |                    |               |                    |      |
| Drug                        | 2,468 (5.55%)   | 5.34 - 5.76   | 1,702 (5.79%)      | 5.52 - 6.05   | 766 (5.06%)        | 4.71 |
| Alcohol                     | 489 (1.10%)     | 1.00 - 1.20   | 293 (1.0%)         | 0.88 - 1.11   | 196 (1.30%)        | 1.12 |
| Tobacco                     | 4,834 (10.18%)  | 9.90 - 10.45  | 3,275<br>(10.40%)  | 10.06 - 10.74 | 1,565 (9.73%)      | 9.27 |
| Anemia                      | 7,570 (19.26%)  | 18.87 - 19.6  | 4,609<br>(18.16%)  | 17.69 - 18.64 | 2,971<br>(21.26%)  | 20.5 |
| Arthritis                   | 434 (1.10%)     | 1.00 - 1.21   | 293 (1.16%)        | 1.02 - 1.29   | 141 (1.01%)        | 0.84 |
| Chronic pulmonary disease   | 4476 (10.06%)   | 9.78 - 10.34  | 3062<br>(10.41%)   | 10.06 - 10.76 | 1429 (9.45%)       | 8.98 |
| Congestive heart failure    | 165 (0.42%)     | 0.36 - 0.48   | 115 (0.45%)        | 0.37 - 0.54   | 50 (0.36%)         | 0.26 |
| Coagulopathy                | 946 (2.41%)     | 2.26 - 2.56   | 592 (2.33%)        | 2.15 - 2.52   | 354 (2.54%)        | 2.27 |
| Depression                  | 3,487 (7.84%)   | 7.59 - 8.09   | 2,391 (8.13%)      | 7.82 - 8.44   | 1,096 (7.25%)      | 6.83 |
| Diabetes                    | 2,104 (4.73%)   | 4.53 - 4.93   | 1,463 (4.97%)      | 4.72 - 5.22   | 641 (4.24%)        | 3.92 |
| Hypertension                | 3,537 (7.95%)   | 7.70 - 8.20   | 2,320 (7.89%)      | 7.58 - 8.19   | 1,217 (8.05%)      | 7.61 |
| Liver disease               | 368 (0.94%)     | 0.84 - 1.03   | 213 (0.84%)        | 0.73 - 0.95   | 155 (1.11%)        | 0.94 |



|                                 |                |               |                |              |               |      |
|---------------------------------|----------------|---------------|----------------|--------------|---------------|------|
| Obesity                         | 6,863 (15.43%) | 15.09 - 15.77 | 4,791 (16.29%) | 15.86 -16.71 | 2,072 (13.7%) | 13.1 |
| Peripheral vascular disorders   | 170 (0.38%)    | 0.32 - 0.44   | 124 (0.42%)    | 0.35 - 0.50  | 45 (0.30%)    | 0.21 |
| Pulmonary circulation disorders | 60 (0.15%)     | 0.12 - 0.19   | 25 (0.10%)     | 0.06 - 0.14  | 35 (0.25%)    | 0.17 |
| Renal failure                   | 325 (0.83%)    | 0.74 - 0.92   | 199 (0.79%)    | 0.68 - 0.89  | 125 (0.90%)   | 0.74 |

132  
 133 Patients discharged from hospitals in the United States were 84 times more likely to have a  
 134 primary or secondary diagnosis of HPV in 2020 compared to 2008 (95% CI: 1.67-2.03). The  
 135 prevalence ratio of HPV was higher among females than males (PR: 295.27; 95% CI: 201.28 -  
 136 457.90). While the number of hospital discharges with an HPV-associated diagnosis was greatest  
 137 among White individuals, the prevalence ratio of HPV was 398 times higher among Hispanics  
 138 than White individuals (95% CI: 3.78-4.18), followed by Blacks (PR: 228; 95% CI: 2.45-2.72).  
 139 The prevalence ratio was also higher for the patients with Medicaid (PR: 45.14; 95% CI: 40.35 –  
 140 50.70). With the regions, the prevalence of HPV was 45 times higher in the South compared to  
 141 the Northeast (95% CI: 1.36-1.53) and 57 times higher in the West compared to the Northeast  
 142 (95% CI: 1.47-1.68) (Table 2).

143 **Table 2.** Prevalence ratio for HPV-related patient discharges and sociodemographic covariates in  
 144 the United States, 2008 – 2020.

| Variables     | Prevalence Ratio (Unadjusted) | 95% confidence interval |       | P-value |
|---------------|-------------------------------|-------------------------|-------|---------|
|               |                               | Lower                   | Upper |         |
| NIS data year |                               |                         |       | < 0.000 |
| 2008          | Reference                     |                         |       |         |
| 2009          | 0.68                          | 0.61                    | 0.77  |         |
| 2010          | 0.8                           | 0.72                    | 0.90  |         |
| 2011          | 1                             | 0.90                    | 1.11  |         |
| 2012          | 0.89                          | 0.79                    | 0.99  |         |

|                                     |           |        |        |         |
|-------------------------------------|-----------|--------|--------|---------|
| 2013                                | 0.97      | 0.87   | 1.09   |         |
| 2014                                | 1.15      | 1.04   | 1.28   |         |
| 2015                                | 1.22      | 1.10   | 1.35   |         |
| 2016                                | 1.23      | 1.11   | 1.37   |         |
| 2017                                | 1.49      | 1.35   | 1.64   |         |
| 2018                                | 1.64      | 1.49   | 1.80   |         |
| 2019                                | 1.55      | 1.41   | 1.71   |         |
| 2020                                | 1.84      | 1.67   | 2.03   |         |
| Sex                                 |           |        |        | < 0.000 |
| Male                                | Reference |        |        |         |
| Female                              | 295.27    | 201.28 | 457.90 |         |
| Age (years)                         |           |        |        |         |
| 18 – 25 years                       | Reference |        |        |         |
| 26 – 40 years                       | 0.94      | 0.90   | 0.98   |         |
| 41-64 years                         | 0.08      | 0.08   | 0.09   |         |
| ≥65 years                           | 0.01      | 0.01   | 0.02   |         |
| Race                                |           |        |        | <0.000  |
| White                               | Reference |        |        |         |
| Black                               | 2.59      | 2.45   | 2.72   |         |
| Hispanic                            | 3.98      | 3.78   | 4.18   |         |
| Asian or Pacific Islander           | 2.29      | 2.05   | 2.56   |         |
| Native American                     | 1.93      | 1.51   | 2.42   |         |
| Other                               | 2.45      | 2.21   | 2.70   |         |
| Primary Payer                       |           |        |        | <0.000  |
| Medicare                            | Reference |        |        |         |
| Medicaid                            | 45.14     | 40.35  | 50.70  |         |
| Private Insurance                   | 18.62     | 16.62  | 20.94  |         |
| Self-pay                            | 10.14     | 8.68   | 11.85  |         |
| No charge                           | 13.96     | 10.05  | 18.91  |         |
| Other                               | 11.46     | 9.69   | 13.55  |         |
| Median household Income, percentile |           |        |        | <0.000  |
| 0-25th                              | Reference |        |        |         |
| 26th-50th                           | 0.78      | 0.74   | 0.82   |         |
| 51th-75th                           | 0.81      | 0.76   | 0.85   |         |
| 76th-100th                          | 0.74      | 0.70   | 0.78   |         |
| US Region                           |           |        |        | <0.000  |
| Northeast                           | Reference |        |        |         |

|                                 |           |      |       |        |
|---------------------------------|-----------|------|-------|--------|
| Midwest                         | 0.89      | 0.83 | 0.95  |        |
| South                           | 1.45      | 1.36 | 1.53  |        |
| West                            | 1.57      | 1.47 | 1.68  |        |
| Length of Hospital stay (days)  |           |      |       | <0.000 |
| 0 - 3 days                      | Reference |      |       |        |
| 4 – 6 days                      | 0.40      | 0.38 | 0.42  |        |
| 7 – 9 days                      | 0.14      | 0.12 | 0.17  |        |
| 10 – 12 days                    | 0.11      | 0.09 | 0.14  |        |
| >13 days or more                | 0.17      | 0.14 | 0.20  |        |
| Comorbidities                   |           |      |       | <0.000 |
| Drug                            | 1.20      | 1.10 | 1.32  |        |
| Alcohol                         | 0.22      | 0.18 | 0.26) |        |
| Tobacco                         | 0.42      | 0.39 | 0.44  |        |
| Anemia                          | 1.36      | 1.28 | 1.43  |        |
| Arthritis                       | 0.40      | 0.32 | 0.49  |        |
| Chronic pulmonary disease       | 0.48      | 0.45 | 0.52  |        |
| Congestive heart failure        | 0.04      | 0.03 | 0.06  |        |
| Coagulopathy                    | 0.54      | 0.47 | 0.62  |        |
| Depression                      | 0.67      | 0.62 | 0.73  |        |
| Diabetes                        | 0.16      | 0.14 | 0.17  |        |
| Hypertension                    | 0.09      | 0.08 | 0.09  |        |
| Liver disease                   | 0.30      | 0.24 | 0.38  |        |
| Obesity                         | 1.22      | 1.15 | 1.29  |        |
| Peripheral vascular disorders   | 0.06      | 0.04 | 0.09  |        |
| Pulmonary circulation disorders | 0.08      | 0.04 | 0.13  |        |
| Renal failure                   | 0.06      | 0.05 | 0.08  |        |

145

#### 146 **Hospital Discharges with a Primary or Secondary HPV Diagnosis**

147 From 2008 to 2020, hospital discharges with a primary or secondary diagnosis of HPV increased  
148 from 6.76% to 10.91% (Figure 1). Our study also revealed notable differences in HPV trends  
149 across races, with white individuals having the highest number of HPV infections as compared to  
150 individuals from other races ( $p < 0.001$ ) (Figure 2). We observed a rising pattern among  
151 individuals aged between 26 and 40 years ( $p < 0.001$ ) (Figure 3). A greater number of HPV

152 diagnoses was found in hospital encounters among females compared to males ( $p < 0.001$ ) (Figure  
153 4).

154 Figure 1. Trends in HPV-associated hospital discharge in the United States from 2008-2020

155 Figure 2. Trends in HPV-associated hospital discharge in the United States by race from 2008-  
156 2020

157 Figure 3. Trends in HPV-associated hospital discharge in the United States by age group from  
158 2008-2020

159 Figure 4. Trends in HPV-associated hospital discharge in the United States by sex from 2008-  
160 2020

## 162 **Discussion**

163 Using hospital discharge registry data from NIS, we observed a significant increase in the  
164 incidence of a primary or secondary diagnosis of HPV in hospital discharges from 2008 to 2020  
165 in the United States despite the introduction of HPV vaccination recommendations in 2006.  
166 These increases were observed among women of younger age groups and the increase from 2008  
167 to 2020 was highest in the 26 to 40 age group. These findings could indicate a greater ability to  
168 detect HPV and a higher emphasis being placed on HPV testing over time; however, the  
169 introduction of vaccination should theoretically have shown a decrease in the incidence of HPV-  
170 associated diagnoses over the course of 12 years despite increased detection.

171 These results follow the American Cancer Society's findings that HPV vaccination rates remain  
172 low in the United States (12). This could be due to insufficient education of patients by  
173 healthcare providers about the risks of HPV infection or about the availability of HPV  
174 vaccination. This could also indicate a lack of public priority on annual wellness visits where  
175 these types of discussions may occur or distrust in the vaccine's safety and efficacy. This study  
176 further supports the need to adopt evidence-based HPV vaccination programs, such as those  
177 listed by the National Institute of Health as part of their evidence-based cancer control programs,  
178 that promote HPV vaccination education in various communities (16).

179 Our findings differed from a prior data analysis from the 2013-2014 National Health and  
180 Nutrition Examination Survey that showed HPV prevalence of any and high-risk genital HPV for  
181 adults aged 18–59 were 45.2% and 25.1% in men and 39.9% and 20.4% in women, respectively  
182 (17). Our results, conversely, showed a greater HPV infection prevalence among women than

183 men. This could be explained by differences in the length of time studied or due to obtaining  
184 information from hospital discharges versus an examination survey (18, 19).

185 Differences in HPV diagnoses were also observed among various racial groups. Whites had the  
186 highest number of hospitalizations associated with an HPV diagnosis, followed by Hispanic  
187 individuals, then Blacks. Our estimate was similar to the study by Pierre-Victor, Trepka (20),  
188 which found a higher HPV prevalence among non-Hispanic White females in the United States  
189 between 14-59 years old. Some prior studies, however, revealed higher HPV infection rates  
190 among non-Hispanic Black adults in the United States. For instance, one study showed that  
191 Black women had twice the prevalence of HPV infection as other racial groups (21). The  
192 difference in our results could be that other racial groups are more likely to go to the hospital  
193 than Blacks. Due to our information being obtained from hospital discharges, this would have  
194 resulted in an underreported percentage of HPV infection among Blacks. The fact that the  
195 prevalence ratios of Blacks and Hispanics were higher than Whites in our results could be a  
196 further testament to this concept.

197 Disparities associated with HPV infection rates were seen in lower socioeconomic groups.  
198 Individuals with lower household incomes had a higher prevalence of HPV infections, while  
199 higher incomes were associated with the lowest number of infections diagnosed. An association  
200 was also found in the primary insurance of HPV-infected individuals, with most of those  
201 diagnosed with HPV infection having Medicaid insurance as the primary payer. This correlates  
202 with other studies that found low socioeconomic status as an associated risk factor for HPV  
203 infection. When looking at a group of low-income, diverse young women, Shikary, Bernstein  
204 (22) found the prevalence of HPV infection to be 68%, much higher than the national average of

205 45.2%. These results illustrate that patients with lower socioeconomic status are at an increased  
206 risk of HPV infection and should, therefore have increased resources for HPV education,  
207 vaccination, and screening.

208 Geographically, more infections were observed in the southern regions of the United States.  
209 Currently, the South has one of the lowest HPV vaccination rates in the USA (23). Moreover, the  
210 high-risk type of HPV infection is higher in the South than in other regions. (20). Benard,  
211 Thomas (24) found the highest levels of HPV-associated cervical cancer in Arkansas, Oklahoma,  
212 Alabama, Tennessee, and Texas. These results indicate that additional efforts are needed to  
213 address HPV prevention and early detection in the southern United States.

214 Vaccination is currently the most effective method to address the increasing incidence of HPV  
215 infection in the United States, and early screening is needed to detect HPV-related neoplastic  
216 transformation at its early stages (6). Additional research is needed to identify barriers to HPV  
217 vaccination and to investigate why HPV vaccination rates remain lower than other routine  
218 vaccinations. In addition, clinical trials are needed to determine how to achieve efficacious early  
219 screening for non-cervical, HPV-related cancers. Future studies should also investigate the most  
220 effective methods of disseminating information about HPV infection, vaccination, and screening  
221 to those with significant risk factors who are unlikely to attend regular wellness visits for early  
222 screening and vaccination.

### 223 **Limitations**

224 A few significant elements in this study's design and analysis could result in misunderstanding.  
225 No longitudinal data are available due to NIS's inability to identify specific patients; ergo,  
226 numerous recordings may be made because of the same patient's repeated hospitalizations. Thus,

227 it is important to understand that the epidemiologic data presented shows the trends and  
228 characteristics leading to hospitalization associated with a primary or secondary diagnosis of  
229 HPV, not the trends and characteristics of becoming infected with HPV. Furthermore, NIS data  
230 does not consider outpatient interactions and observation-only stays, so there may be an  
231 underrepresentation of patients infected with HPV who are being monitored only in an outpatient  
232 setting. In addition, the sampling methodology forbids the estimation of volumes for subsets (for  
233 example, state-level estimates cannot be derived by applying discharge weights to all sampled  
234 hospitals/patients within a state). Finally, the administrative, diagnostic, and procedural codes  
235 utilized by NIS for the linked hospitalizations are supplied on the billing record. They are not  
236 individually validated due to changes in methodology in 2012 that prevented hospital-level  
237 estimates from being produced.

238

## 239 **Conclusion**

240 Overall, the prevalence of HPV has increased in the United States in the past 12 years.  
241 Understanding the trends and characteristics of HPV infection can contribute to public health  
242 interventions aimed at prevention and early detection. Efforts to improve HPV vaccination rates  
243 and address risk factors associated with HPV infection are crucial to reducing the burden of HPV-  
244 related diseases. Further research can be conducted among those at higher risk to investigate the  
245 underlying factors responsible for the disparities and increasing rates of HPV observed in this  
246 study.

247

## 248 **Appendices**

### 249 **Appendix A: ICD-9 and ICD-10 code description for HPV:**



250 ICD-9 codes

251 795.05 = cervical high risk human papillomavirus; DNA test positive

252 795.09 = other abnormal Papanicolaou smear of cervix and cervical human papillomavirus;  
253 cervical low-risk human papillomavirus; DNA test positive.

254 796.75 = anal high risk human papillomavirus; DNA test positive

255 796.79 = other abnormal Papanicolaou smear of anus and anal HPV; anal low-risk human  
256 papillomavirus; DNA test positive.

257 ICD-10 codes

258 R87.810 = high-risk human papillomavirus DNA test positive

259 R87.820 = cervical low-risk human papillomavirus DNA test positive

260 R85.81= high-risk human papillomavirus DNA test positive from female genital organs

261 R85.82 = low-risk human papillomavirus DNA test positive from female genital organs

262

## 263 **References**

264 1. Arbyn M, Weiderpass E, Bruni L, de Sanjosé S, Saraiya M, Ferlay J, et al. Estimates of  
265 incidence and mortality of cervical cancer in 2018: a worldwide analysis. *The Lancet Global*  
266 *Health*. 2020;8(2):e191-e203.

267 2. Bruni L, Diaz M, Castellsagué M, Ferrer E, Bosch FX, de Sanjosé S. Cervical human  
268 papillomavirus prevalence in 5 continents: meta-analysis of 1 million women with normal  
269 cytological findings. *Journal of Infectious Diseases*. 2010;202(12):1789-99.

270 3. Roman BR, Aragones A. Epidemiology and incidence of HPV-related cancers of the  
271 head and neck. *Journal of Surgical Oncology*. 2021;124(6):920-2.

- 272 4. Meites E, Szilagyi PG, Chesson HW, Unger ER, Romero JR, Markowitz LE. Human  
273 Papillomavirus Vaccination for Adults: Updated Recommendations of the Advisory Committee  
274 on Immunization Practices. *MMWR Morb Mortal Wkly Rep.* 2019;68(32):698-702.
- 275 5. Centers for Disease Control and Prevention. Cancers Associated with Human  
276 Papillomavirus, United States, 2015–2019. Atlanta, GA: Centers for Disease Control and  
277 Prevention, US Department of Health and Human Services.; 2022 October 24, 2023. Contract  
278 No.: USCS Data Brief,.
- 279 6. Siegel RL, Miller KD, Wagle NS, Jemal A. Cancer statistics, 2023. *CA: a cancer journal*  
280 *for clinicians.* 2023;73(1):17-48.
- 281 7. Winer RL, Lee S-K, Hughes JP, Adam DE, Kiviat NB, Koutsky LA. Genital human  
282 papillomavirus infection: incidence and risk factors in a cohort of female university students.  
283 *American journal of epidemiology.* 2003;157(3):218-26.
- 284 8. Senkomago V, Henley SJ, Thomas CC, Mix JM, Markowitz LE, Saraiya M. Human  
285 papillomavirus–attributable cancers—United States, 2012–2016. *Morbidity and Mortality*  
286 *Weekly Report.* 2019;68(33):724.
- 287 9. Steinau M, Saraiya M, Goodman MT, Peters ES, Watson M, Cleveland JL, et al. Human  
288 papillomavirus prevalence in oropharyngeal cancer before vaccine introduction, United States.  
289 2014.
- 290 10. Xu L, Dahlstrom KR, Lairson DR, Sturgis EM. Projected oropharyngeal carcinoma  
291 incidence among middle-aged US men. *Head & Neck.* 2019;41(9):3226-34.

- 292 11. World Health Organization. Cervical Cancer. 2022 February 22.
- 293 12. Siegel RL, Miller KD, Fuchs HE, Jemal A. Cancer statistics, 2022. *CA: a cancer journal*  
294 *for clinicians*. 2022;72(1):7-33.
- 295 13. Ghebre R, Berry-Lawhorn JM, D'Souza G. State of the science: screening, surveillance,  
296 and epidemiology of HPV-related malignancies. *American Society of Clinical Oncology*  
297 *Educational Book*. 2021;41:377-88.
- 298 14. Agency for Healthcare Research and Quality. HCUP using multiple years of data tutorial  
299 2023 [Available from: [https://hcup-us.ahrq.gov/tech\\_assist/trends/508/508course\\_2019.jsp](https://hcup-us.ahrq.gov/tech_assist/trends/508/508course_2019.jsp).
- 300 15. Houchens R R, D, Elixhauser A, Jiang J. . Nationwide Inpatient Sample (NIS) Redesign  
301 Final Report. 2014. HCUP Methods Series Report # 2014-04 ONLINE. . U.S. Agency for  
302 Healthcare Research and Quality.; 2014 April 4, 2014.
- 303 16. NIH. Evidence-Based Cancer Control Programs (EBCCP), HPV Vaccination Evidence-  
304 Based Programs Listing. 2023 [Available from:  
305 <https://ebccp.cancercontrol.cancer.gov/topicPrograms.do?topicId=22626661&choice=defaultThi>  
306 [s](#)
- 307 17. McQuillan GM, Kruszon-Moran D, Markowitz LE, Unger ER, Paulose-Ram R.  
308 Prevalence of HPV in adults aged 18-69: United States, 2011-2014: US Department of Health  
309 and Human Services, Centers for Disease Control and ...; 2017.

- 310 18. Gerend MA, Shepherd MA, Lustria MLA. Increasing human papillomavirus vaccine  
311 acceptability by tailoring messages to young adult women's perceived barriers. Sexually  
312 transmitted diseases. 2013;40(5):401-5.
- 313 19. Beavis AL, Levinson KL. Preventing cervical cancer in the United States: barriers and  
314 resolutions for HPV vaccination. *Frontiers in Oncology*. 2016;6:19.
- 315 20. Pierre-Victor D, Trepka MJ, Stephens D, Li T, Page T, Madhivanan P. Human  
316 papillomavirus infections in the Southern and other United States regions. *Journal of Health  
317 Disparities Research and Practice*. 2018;11(2):1.
- 318 21. Shi R, Devarakonda S, Liu L, Taylor H, Mills G. Factors associated with genital human  
319 papillomavirus infection among adult females in the United States, NHANES 2007–2010. *BMC  
320 research notes*. 2014;7(1):1-8.
- 321 22. Shikary T, Bernstein DI, Jin Y, Zimet GD, Rosenthal SL, Kahn JA. Epidemiology and  
322 risk factors for human papillomavirus infection in a diverse sample of low-income young  
323 women. *Journal of Clinical Virology*. 2009;46(2):107-11.
- 324 23. Adjei Boakye E, Babatunde OA, Wang M, Osazuwa-Peters N, Jenkins W, Lee M, et al.  
325 Geographic Variation in Human Papillomavirus Vaccination Initiation and Completion Among  
326 Young Adults in the U.S. *Am J Prev Med*. 2021;60(3):387-96.
- 327 24. Benard VB, Thomas CC, King J, Massetti GM, Doria-Rose VP, Saraiya M. Vital signs:  
328 cervical cancer incidence, mortality, and screening—United States, 2007–2012. *Morbidity and  
329 mortality weekly report*. 2014;63(44):1004.
- 330

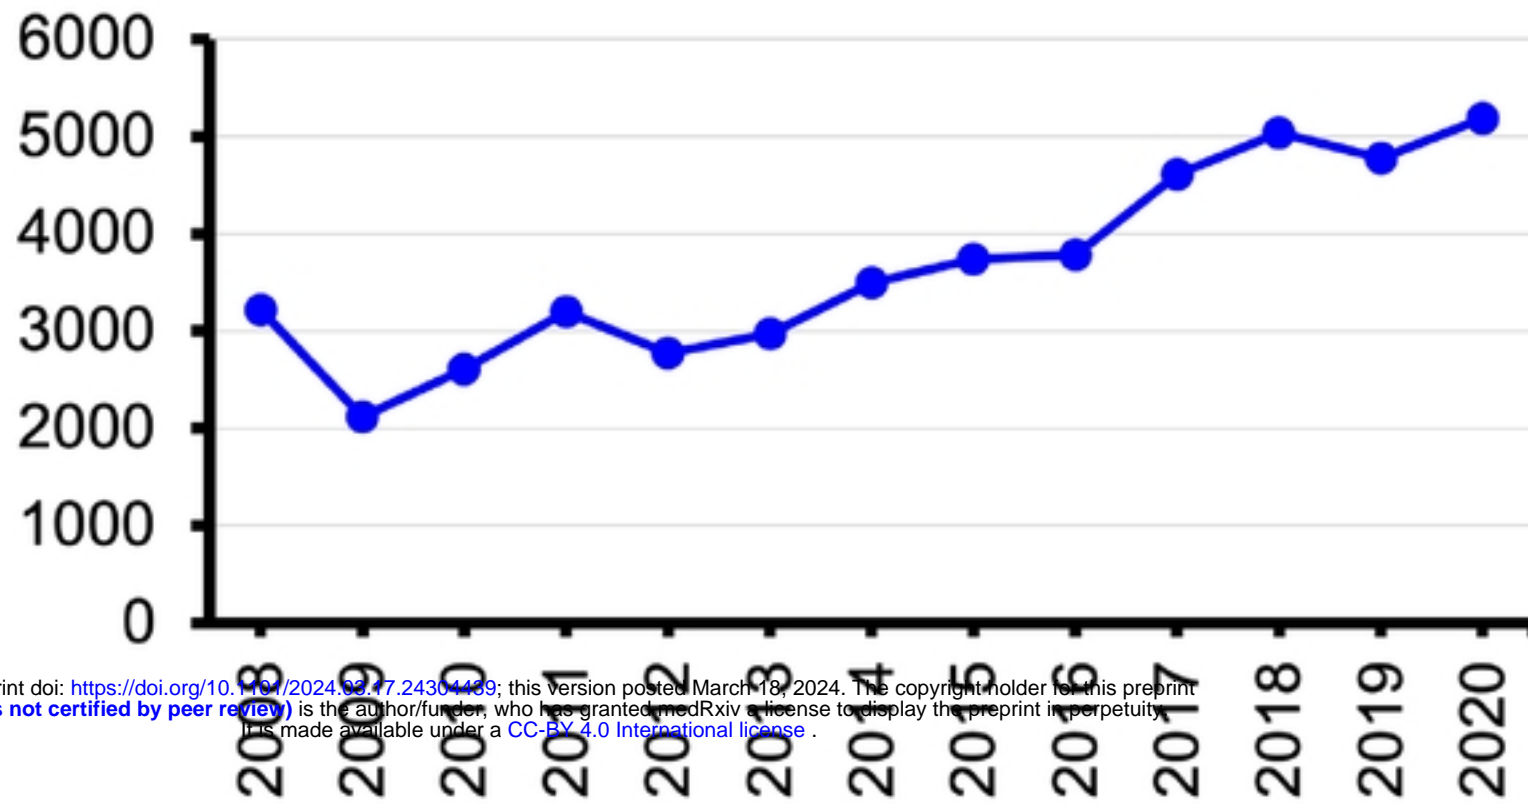

medRxiv preprint doi: <https://doi.org/10.1101/2024.03.17.24304439>; this version posted March 18, 2024. The copyright holder for this preprint (which was not certified by peer review) is the author/funder, who has granted medRxiv a license to display the preprint in perpetuity. It is made available under a [CC-BY 4.0 International license](https://creativecommons.org/licenses/by/4.0/).

Figure 1. Trends in HPV-associated hospital discharge in the United States from 2008-2020

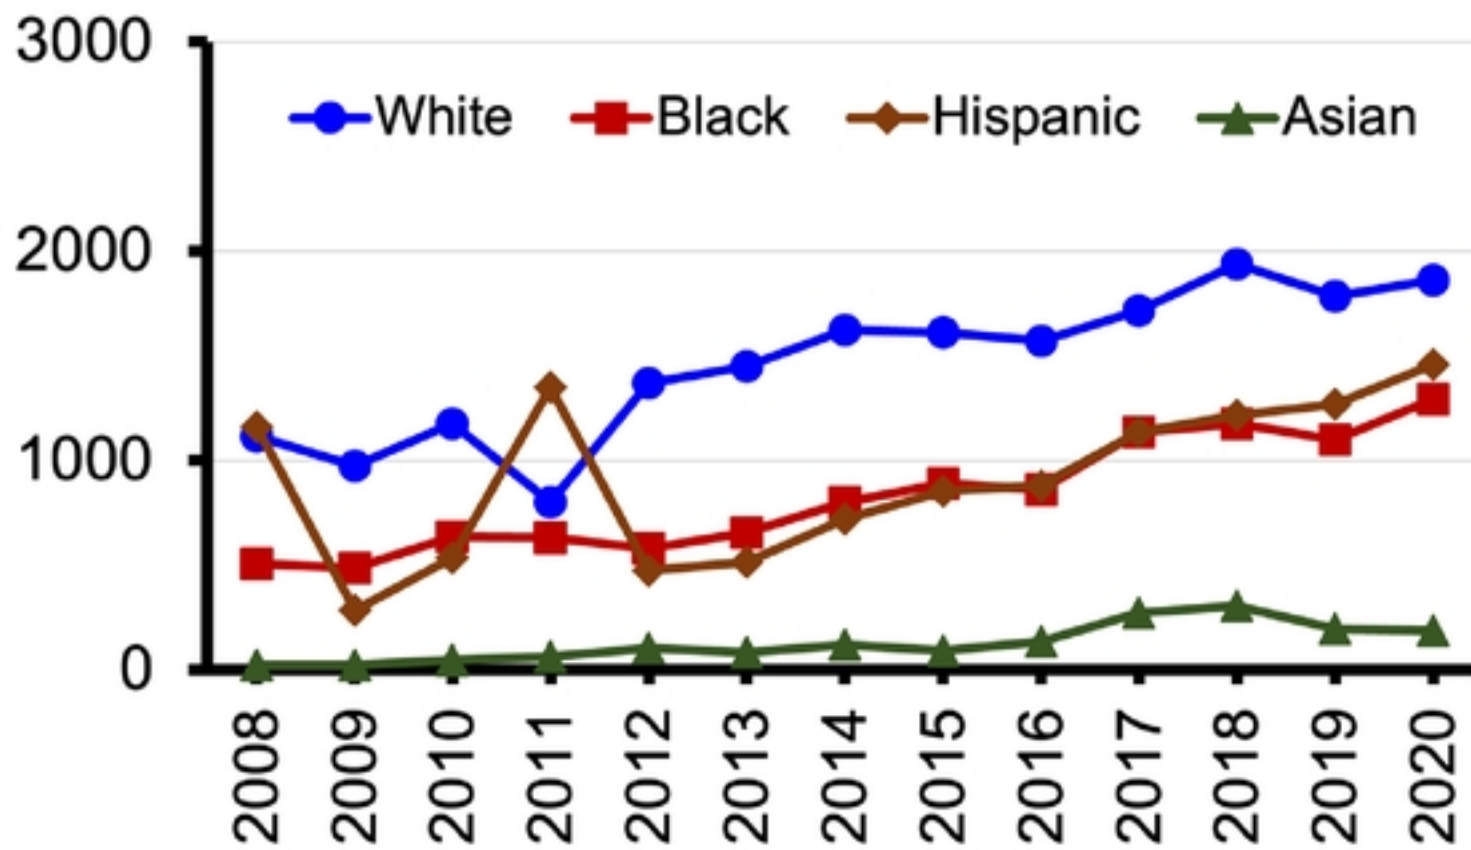

Figure 2. Trends in HPV-associated hospital discharge in the United States by race from 2008-2020

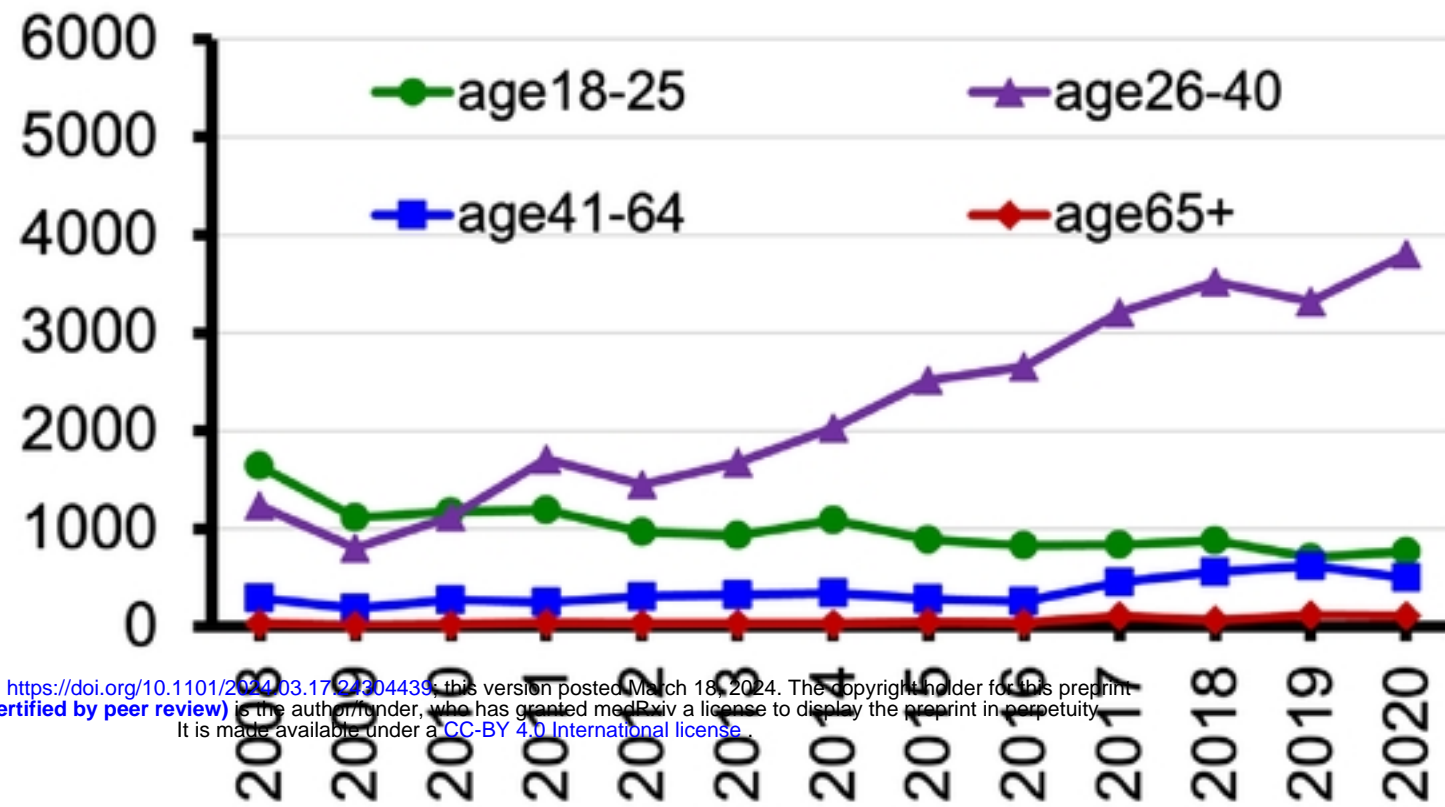

medRxiv preprint doi: <https://doi.org/10.1101/2024.03.17.2404439>; this version posted March 18, 2024. The copyright holder for this preprint (which was not certified by peer review) is the author/funder, who has granted medRxiv a license to display the preprint in perpetuity. It is made available under a [CC-BY 4.0 International license](https://creativecommons.org/licenses/by/4.0/).

Figure 3. Trends in HPV-associated hospital discharge in the United States by age group from 2008-2020

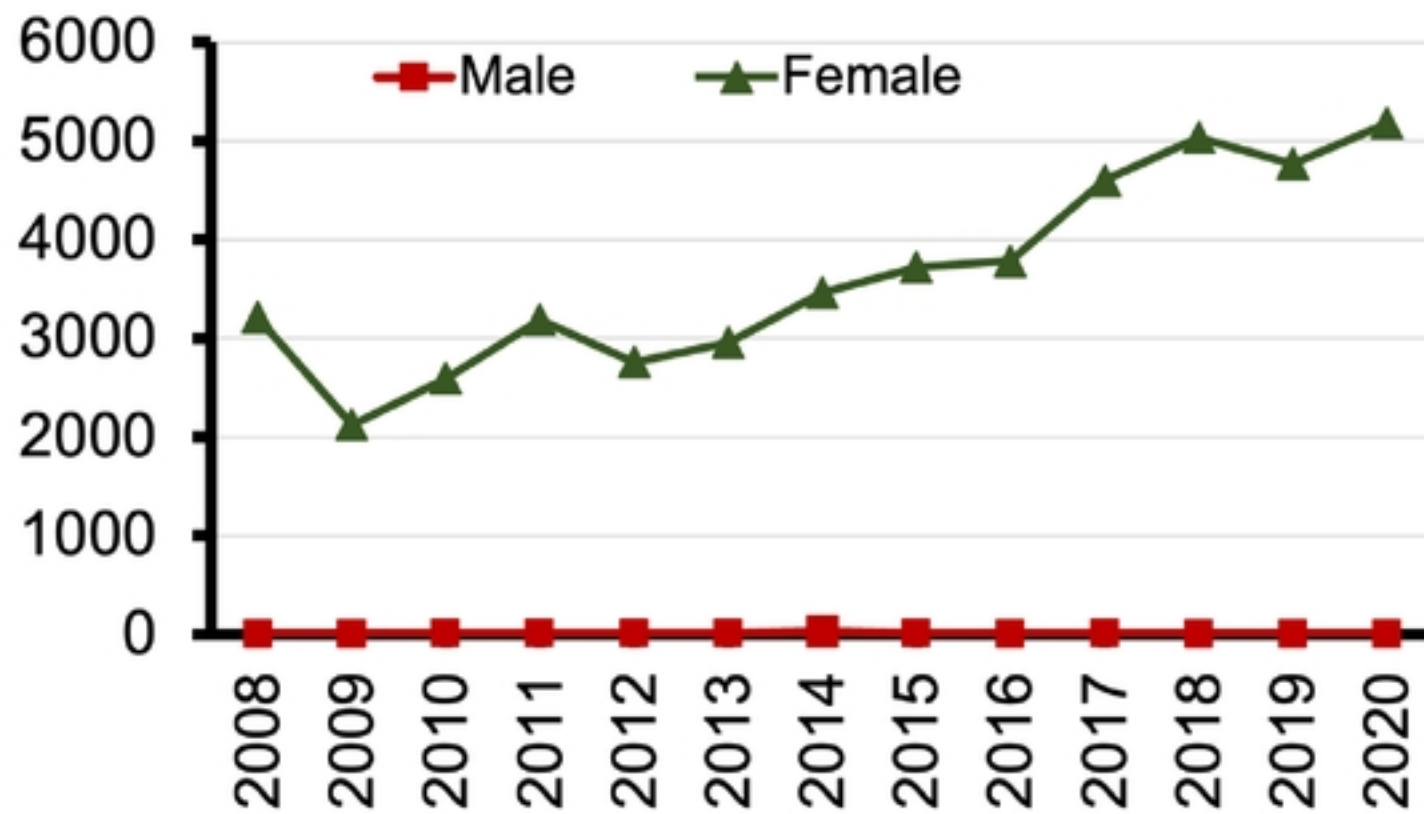

Figure 4. Trends in HPV-associated hospital discharge in the United States by sex from 2008-2020
